# Supplementary material
Source: ML conference proceedings conference paper supplement (https://openreview.net/forum?id=69OK8v8BSJ)
Supplement: supplementary_material [file attachment]

| Trajectory  | Cam scale | CFG | SEVA (KID $\times 10^{-2}$ ) | SEVA (FID) | HUGIN (KID $\times 10^{-2}$ ) | HUGIN (FID) | OpenCV (KID $\times 10^{-2}$ ) | OpenCV (FID) | Custom (KID $\times 10^{-2}$ ) | Custom (FID) |
|-------------|-----------|-----|------------------------------|------------|-------------------------------|-------------|--------------------------------|--------------|--------------------------------|--------------|
| pano        | 0.5       | 2   | 1.17                         | 56         | 1.67                          | 85          | 2.16                           | 156          | 1.90                           | 75           |
| pano-circle | 0.5       | 2   | 1.07                         | 52         | 1.76                          | 88          | 1.51                           | 77           | 1.89                           | 74           |
| pano-circle | 0.5       | 5   | 0.86                         | 50         | 1.13                          | 81          | 1.25                           | 77           | 1.21                           | 66           |
| pano-circle | 0.5       | 8   | 1.25                         | 58         | 1.49                          | 86          | 1.80                           | 83           | 1.35                           | 71           |
| pano        | 0.1       | 5   | 0.76                         | 49         | –                             | –           | –                              | –            | 0.97                           | 64           |
| pano-circle | 0.1       | 5   | 0.70                         | 48         | 0.83                          | 81          | 1.00                           | 69           | 1.13                           | 65           |

(a) SUN360 ablation (KID $\times 10^2$ ).

| Trajectory  | Cam scale | CFG | SEVA (KID $\times 10^{-2}$ ) | SEVA (FID) | HUGIN (KID $\times 10^{-2}$ ) | HUGIN (FID) | OpenCV (KID $\times 10^{-2}$ ) | OpenCV (FID) | Custom (KID $\times 10^{-2}$ ) | Custom (FID) |
|-------------|-----------|-----|------------------------------|------------|-------------------------------|-------------|--------------------------------|--------------|--------------------------------|--------------|
| pano        | 0.5       | 2   | 1.17                         | 52         | 3.03                          | 103         | 2.28                           | 84           | 1.65                           | 72           |
| pano-circle | 0.5       | 2   | 1.13                         | 49         | –                             | –           | 2.08                           | 90           | 2.05                           | 77           |
| pano-circle | 0.5       | 5   | 0.70                         | 41         | 1.84                          | 95          | 1.60                           | 81           | 0.89                           | 60           |
| pano-circle | 0.5       | 8   | 0.70                         | 41         | 1.89                          | 84          | 1.52                           | 81           | 0.91                           | 60           |
| pano        | 0.1       | 5   | 0.70                         | 42         | –                             | –           | –                              | –            | 0.74                           | 60           |
| pano-circle | 0.1       | 5   | 0.66                         | 40         | 2.06                          | 98          | 1.05                           | 67           | 0.82                           | 59           |

(b) Laval Indoor ablation (KID $\times 10^2$ ).

Figure 1: Ablation results on SUN360 (a) and Laval Indoor (b) datasets: FID and KID for various stitching methods across camera-scale, CFG settings and trajectory choice. These ablation results are executed on a test size of 100.

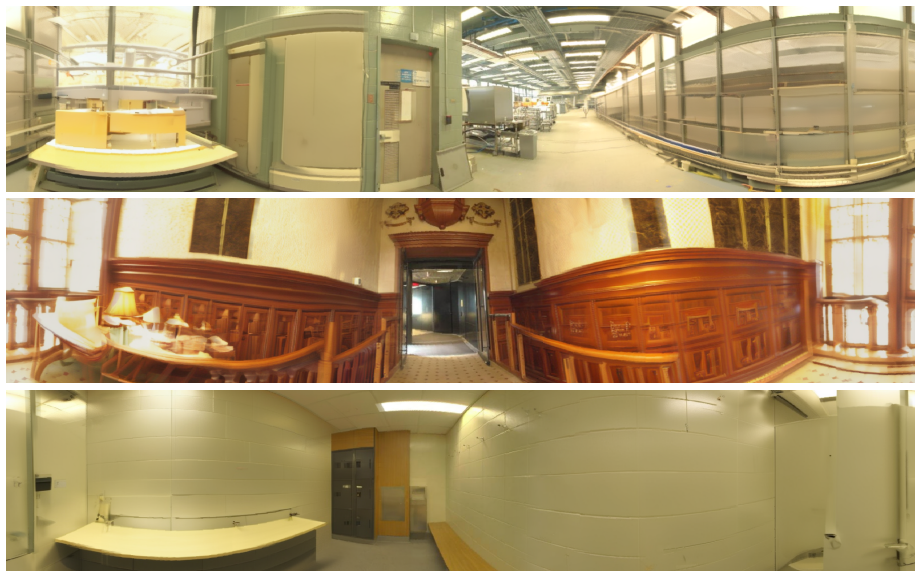

Figure 2: Generated panoramas on Laval Indoor [1] and SUN360 [2].

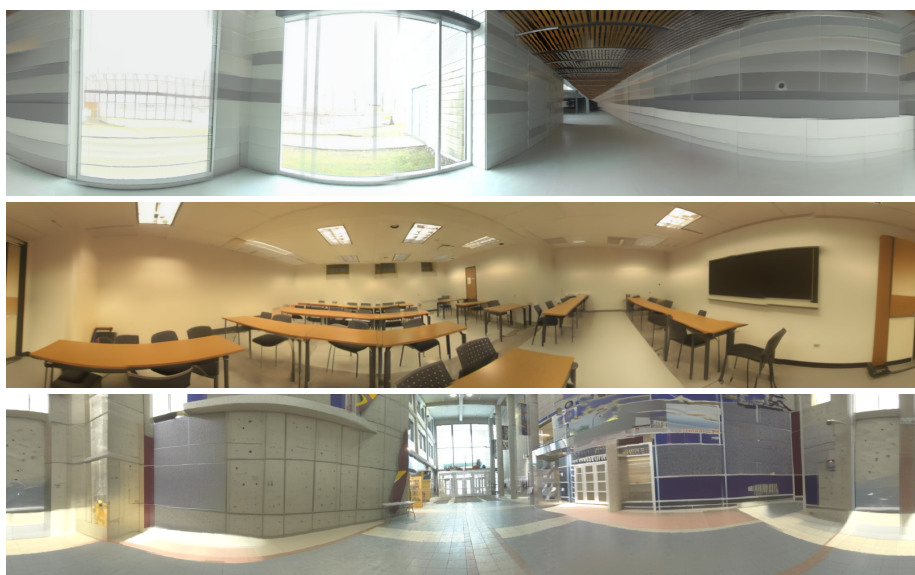

Figure 2: Generated panoramas on Laval Indoor [1] and SUN360 [2].

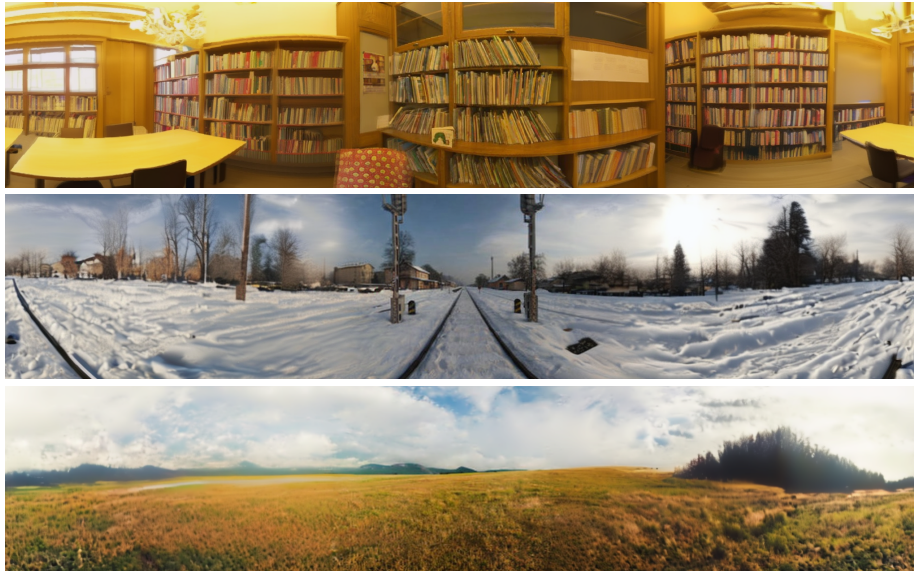

Figure 2: Generated panoramas on Laval Indoor [1] and SUN360 [2].

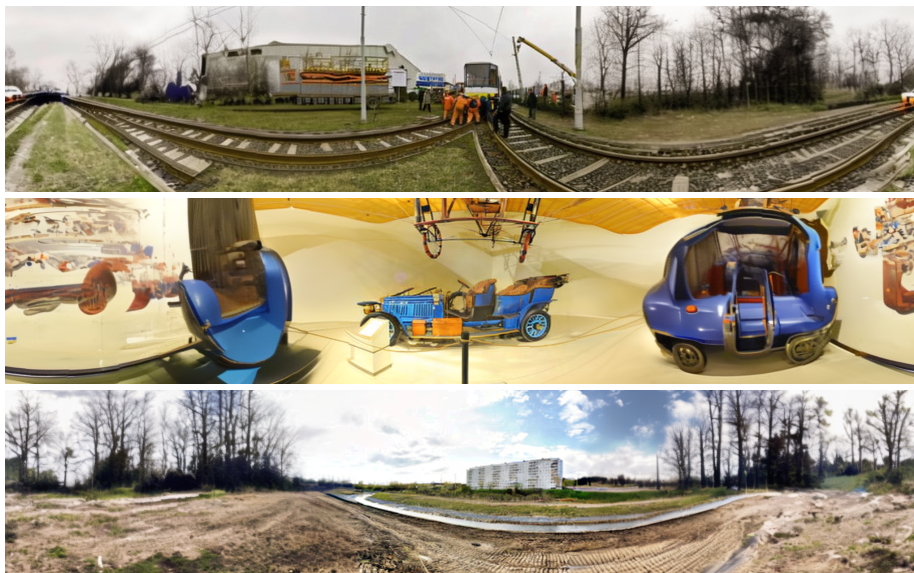

Figure 2: Generated panoramas on Laval Indoor [1] and SUN360 [2].

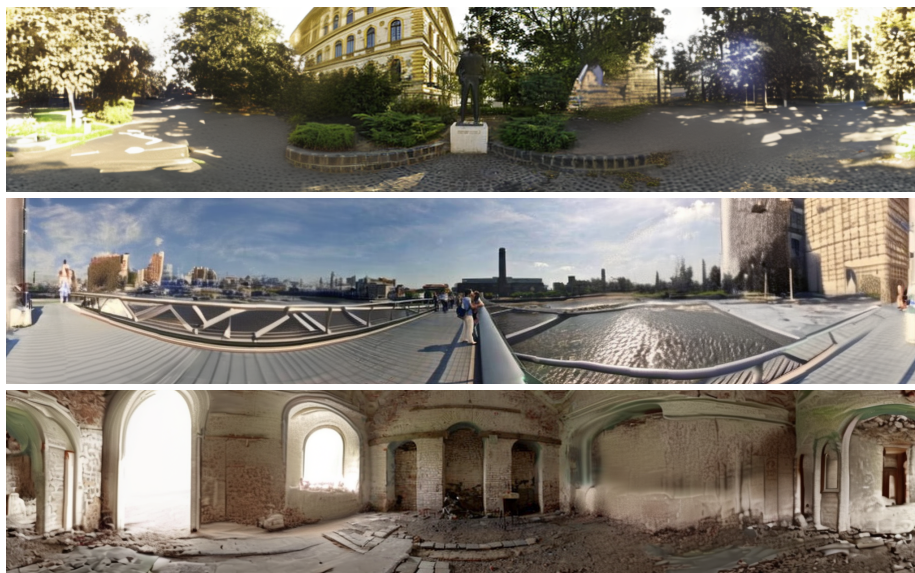

Figure 2: Generated panoramas on Laval Indoor [1] and SUN360 [2].
